# Supplementary material for: Treatment outcome of tardy ulnar nerve palsy associated with traumatic cubitus valgus by supracondylar shortening wedge rotary osteotomy and ulnar nerve in situ tension release
Source: BMC Musculoskelet Disord. 2022 Apr 20;23:369. doi: 10.1186/s12891-022-05324-7 (PMC9022348; doi:10.1186/s12891-022-05324-7)
Supplement: Supplementary file 1 — Additional file 1. [file 12891_2022_5324_MOESM1_ESM.xlsx]

## Sheet: Sheet1
Case	Gender	Age(year)	Followup(months)	HEW angle(°)		ROM(°)		Grip strength (kg )		2-PD(mm)		DASH		Result
				Preoperative	Postoperative	Preoperative	Postoperative	Preoperative	Postoperative	Preoperative	Postoperative	Preoperative	Postoperative
1	M	28	35	28.8	12.2	90	136	16	20	5	3	23	16	Excellent
2	M	18	28	25.5	11.4	75	110	13	22	14	7	34	18	Excellent
3	M	44	34	28.3	14.6	83	118	20	30	6	4	26	20	Excellent
4	M	17	33	27.3	10.8	112	120	18	23	7	2	25	13	Excellent
5	F	30	42	24.4	13.6	106	112	10	16	10	4	38	21	Excellent
6	M	32	24	23.8	12.4	118	129	13	13	8	4	36	19	Excellent
7	M	46	29	25.2	12.1	113	118	18	25	9	5	25	14	Excellent
8	M	44	38	25.8	16.4	120	126	19	27	8	3	20	15	Excellent
9	M	48	40	20.6	10.7	18	130	30	44	4	4	39	24	Excellent
10	M	56	33	21.8	10.4	120	126	9	16	11	5	40	26	Excellent
11	M	49	30	26	13.3	125	129	24	40	9	4	27	20	Excellent
12	M	52	25	21.4	13.1	128	122	33	42	3	5	18	16	Good
13	M	29	44	23.2	11.6	95	116	30	36	7	4	43	20	Excellent
14	M	47	37	24.1	10.4	115	130	27	22	8	5	35	19	Excellent
15	M	50	24	26.2	11.8	96	110	32	39	6	3	24	13	Excellent
16	F	53	36	20.8	9.5	118	124	29	34	11	6	37	22	Excellent
